# Supplementary material for: Magnetic Hyperthermia in Y79 Retinoblastoma and ARPE-19 Retinal Epithelial Cells: Tumor Selective Apoptotic Activity of Iron Oxide Nanoparticle
Source: PubMed Central journal article supplement (PMC6779177; doi:10.1167/tvst.8.5.18), 2019-09-27
Supplement: tvst-08-04-43_s01.pdf [file tvst-08-04-43_s01.pdf]

**Supplemental Table 1. Genes upregulated 24 hours after magnetic hyperthermia in Y-79 retinoblastoma cells treated with 1 mg/ml of dextran-coated iron oxide nanoparticles compared to untreated cells**

| <b>Gene</b>      | <b>Description</b>                                            | <b>Fold Change</b> |
|------------------|---------------------------------------------------------------|--------------------|
| <i>FASLG</i>     | Fas ligand (TNF superfamily, member 6)                        | 1133.0533          |
| <i>TNF</i>       | Tumor necrosis factor                                         | 665.9792           |
| <i>IL10</i>      | Interleukin 10                                                | 646.273            |
| <i>BAG3</i>      | BCL2-associated athanogene 3                                  | 583.8012           |
| <i>CASP14</i>    | Caspase 14, apoptosis-related cysteine peptidase              | 317.2186           |
| <i>TNFRSF9</i>   | Tumor necrosis factor receptor superfamily, member 9          | 269.2246           |
| <i>PYCARD</i>    | PYD and CARD domain containing                                | 265.5181           |
| <i>LTBR</i>      | Lymphotoxin beta receptor (TNFR superfamily, member 3)        | 258.2575           |
| <i>BCL2A1</i>    | BCL2-related protein A1                                       | 140.0049           |
| <i>LTA</i>       | Lymphotoxin alpha (TNF superfamily, member 1)                 | 130.0269           |
| <i>BIRC3</i>     | Baculoviral IAP repeat containing 3                           | 112.9338           |
| <i>CFLAR</i>     | CASP8 and FADD-like apoptosis regulator                       | 97.4101            |
| <i>CD70</i>      | CD70 molecule                                                 | 52.6855            |
| <i>CD40</i>      | CD40 molecule, TNF receptor superfamily member 5              | 47.9237            |
| <i>CASP10</i>    | Caspase 10, apoptosis-related cysteine peptidase              | 44.4055            |
| <i>BCL2L10</i>   | BCL2-like 10 (apoptosis facilitator)                          | 38.037             |
| <i>CD40LG</i>    | CD40 ligand                                                   | 37.1683            |
| <i>CASP5</i>     | Caspase 5, apoptosis-related cysteine peptidase               | 35.2447            |
| <i>TNFRSF1A</i>  | Tumor necrosis factor receptor superfamily, member 1A         | 32.9605            |
| <i>FAS</i>       | Fas (TNF receptor superfamily, member 6)                      | 32.1334            |
| <i>CASP8</i>     | Caspase 8, apoptosis-related cysteine peptidase               | 31.8378            |
| <i>HRK</i>       | Harakiri, BCL2 interacting protein (contains only BH3 domain) | 31.7643            |
| <i>CD27</i>      | CD27 molecule                                                 | 25.0372            |
| <i>TNFSF10</i>   | Tumor necrosis factor (ligand) superfamily, member 10         | 24.7496            |
| <i>CASP4</i>     | Caspase 4, apoptosis-related cysteine peptidase               | 24.1285            |
| <i>BCL2L11</i>   | BCL2-like 11 (apoptosis facilitator)                          | 22.5648            |
| <i>TNFSF8</i>    | Tumor necrosis factor (ligand) superfamily, member 8          | 20.196             |
| <i>TNFRSF25</i>  | Tumor necrosis factor receptor superfamily, member 25         | 17.2996            |
| <i>RIPK2</i>     | Receptor-interacting serine-threonine kinase 2                | 17.1009            |
| <i>CASP1</i>     | Caspase 1, apoptosis-related cysteine peptidase               | 15.736             |
| <i>TNFRSF10A</i> | Tumor necrosis factor receptor superfamily, member 10a        | 15.3057            |
| <i>BIK</i>       | BCL2-interacting killer (apoptosis-inducing)                  | 11.8433            |
| <i>TNFRSF1B</i>  | Tumor necrosis factor receptor superfamily, member 1B         | 11.5728            |
| <i>MCL1</i>      | Myeloid cell leukemia sequence 1 (BCL2-related)               | 10.0515            |
| <i>BAG1</i>      | BCL2-associated athanogene                                    | 9.982              |
| <i>TNFRSF11B</i> | Tumor necrosis factor receptor superfamily, member 11b        | 9.982              |
| <i>TNFRSF21</i>  | Tumor necrosis factor receptor superfamily, member 21         | 9.5533             |
| <i>TP53BP2</i>   | Tumor protein p53 binding protein, 2                          | 6.3614             |
| <i>BAD</i>       | BCL2-associated agonist of cell death                         | 5.3864             |
| <i>BCL10</i>     | B-cell CLL/lymphoma 10                                        | 5.2756             |
| <i>CYCS</i>      | Cytochrome c, somatic                                         | 5.0374             |
| <i>NOL3</i>      | Nucleolar protein 3 (apoptosis repressor with CARD domain)    | 4.9565             |
| <i>BRAF</i>      | V-raf murine sarcoma viral oncogene homolog B1                | 4.646              |
| <i>TRADD</i>     | TNFRSF1A-associated via death domain                          | 4.4982             |
| <i>BIRC6</i>     | Baculoviral IAP repeat containing 6                           | 4.2457             |
| <i>GADD45A</i>   | Growth arrest and DNA-damage-inducible, alpha                 | 4.026              |

|                  |                                                                      |        |
|------------------|----------------------------------------------------------------------|--------|
| <i>TRAF3</i>     | TNF receptor-associated factor 3                                     | 3.8442 |
| <i>BCL2</i>      | B-cell CLL/lymphoma 2                                                | 3.7825 |
| <i>CASP2</i>     | Caspase 2, apoptosis-related cysteine peptidase                      | 3.4248 |
| <i>TNFRSF10B</i> | Tumor necrosis factor receptor superfamily, member 10b               | 3.3854 |
| <i>TRAF2</i>     | TNF receptor-associated factor 2                                     | 3.24   |
| <i>APAF1</i>     | Apoptotic peptidase activating factor 1                              | 3.188  |
| <i>CASP9</i>     | Caspase 9, apoptosis-related cysteine peptidase                      | 3.1514 |
| <i>NOD1</i>      | Nucleotide-binding oligomerization domain containing 1               | 3.0511 |
| <i>BNIP2</i>     | BCL2/adenovirus E1B 19kDa interacting protein 2                      | 2.8865 |
| <i>BIRC5</i>     | Baculoviral IAP repeat containing 5                                  | 2.8402 |
| <i>CIDEB</i>     | Cell death-inducing DFFA-like effector b                             | 2.7625 |
| <i>CIDEA</i>     | Cell death-inducing DFFA-like effector a                             | 2.2595 |
| <i>BNIP3</i>     | BCL2/adenovirus E1B 19kDa interacting protein 3                      | 2.1825 |
| <i>ABL1</i>      | C-abl oncogene 1, non-receptor tyrosine kinase                       | 2.1228 |
| <i>AKT1</i>      | V-akt murine thymoma viral oncogene homolog 1                        | 2.0936 |
| <i>BAK1</i>      | BCL2-antagonist/killer 1                                             | 2.0553 |
| <i>NFKB1</i>     | Nuclear factor of kappa light polypeptide gene enhancer in B-cells 1 | 1.9088 |
| <i>DIABLO</i>    | Diablo, IAP-binding mitochondrial protein                            | 1.7124 |
| <i>BAX</i>       | BCL2-associated X protein                                            | 1.6849 |
| <i>TP53</i>      | Tumor protein p53                                                    | 1.6849 |
| <i>DFFA</i>      | DNA fragmentation factor, 45kDa, alpha polypeptide                   | 1.477  |
| <i>NAIP</i>      | NLR family, apoptosis inhibitory protein                             | 1.4634 |
| <i>IGF1R</i>     | Insulin-like growth factor 1 receptor                                | 1.3877 |
| <i>FADD</i>      | Fas (TNFRSF6)-associated via death domain                            | 1.2478 |
| <i>BNIP3L</i>    | BCL2/adenovirus E1B 19kDa interacting protein 3-like                 | 1.2164 |
| <i>DAPK1</i>     | Death-associated protein kinase 1                                    | 1.1777 |
| <i>BFAR</i>      | Bifunctional apoptosis regulator                                     | 0.9858 |
| <i>CASP3</i>     | Caspase 3, apoptosis-related cysteine peptidase                      | 0.8722 |
| <i>BCL2L2</i>    | BCL2-like 2                                                          | 0.8309 |
| <i>BID</i>       | BH3 interacting domain death agonist                                 | 0.664  |
| <i>CASP7</i>     | Caspase 7, apoptosis-related cysteine peptidase                      | 0.664  |
| <i>BCL2L1</i>    | BCL2-like 1                                                          | 0.6625 |
| <i>CASP6</i>     | Caspase 6, apoptosis-related cysteine peptidase                      | 0.6399 |
| <i>TP73</i>      | Tumor protein p73                                                    | 0.5998 |
| <i>XIAP</i>      | X-linked inhibitor of apoptosis                                      | 0.5584 |
| <i>BIRC2</i>     | Baculoviral IAP repeat containing 2                                  | 0.4463 |
| <i>CRADD</i>     | CASP2 and RIPK1 domain containing adaptor with death domain          | 0.4013 |
| <i>AIFM1</i>     | Apoptosis-inducing factor, mitochondrion-associated, 1               | 0.3701 |
